# Supplementary material for: MOF nanosheet-derived carbon-layer-coated CoP/g-C3N4photocatalysts with enhanced charge transfer for efficient photocatalytic H2generation
Source: Royal Society of Chemistry journal article supplement (doi:10.1039/d2ce00632d), 2022-01-01
Supplement: d2ce00632d1.pdf [file d2ce00632d1.pdf]

## Supporting Information

For

**MOF nanosheet-derived carbon-layer-coated CoP/g-C<sub>3</sub>N<sub>4</sub>  
photocatalysts with enhance charge transfer for efficient  
photocatalytic H<sub>2</sub> generation**

Yan Ma<sup>a</sup>, Dianjun Chi<sup>a</sup>, Yuping Tao<sup>a</sup>, Shengjun Liu<sup>\*a</sup>, Lei Dong<sup>a</sup>, Yu Chen<sup>a</sup>, Lifang He<sup>\*a</sup>  
and Kui Zhang<sup>a</sup>

*School of Chemistry and Chemical Engineering, Anhui University of Technology,  
Ma'anshan, Anhui 243032, China*

**\*Corresponding authors:** Shengjun Liu, E-mail: lsj1990@mail.ustc.edu.cn.

Lifang He, E-mail: lifanghe@ahut.edu.cn.

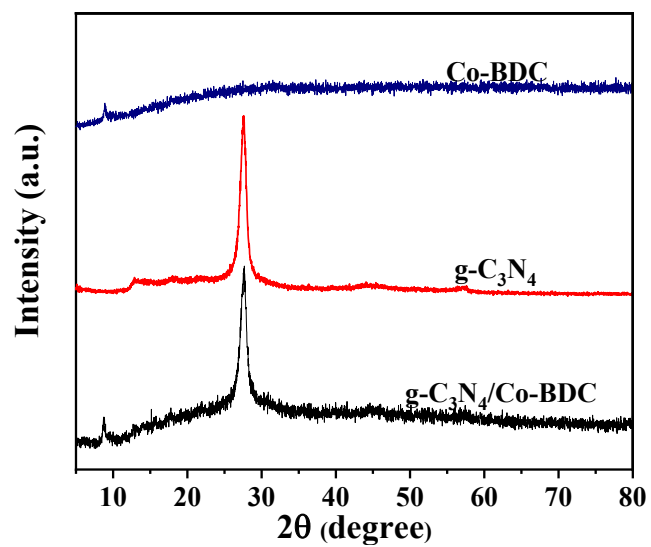

**Figure S1.** XRD patterns of Co-BDC nanosheets, g-C<sub>3</sub>N<sub>4</sub> nanosheet and g-C<sub>3</sub>N<sub>4</sub>/ Co-BDC nanosheet.

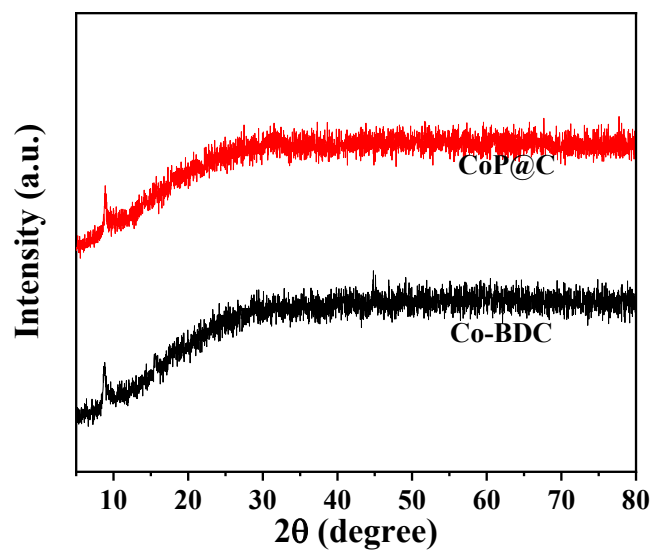

**Figure S2.** XRD patterns of CoP@C.

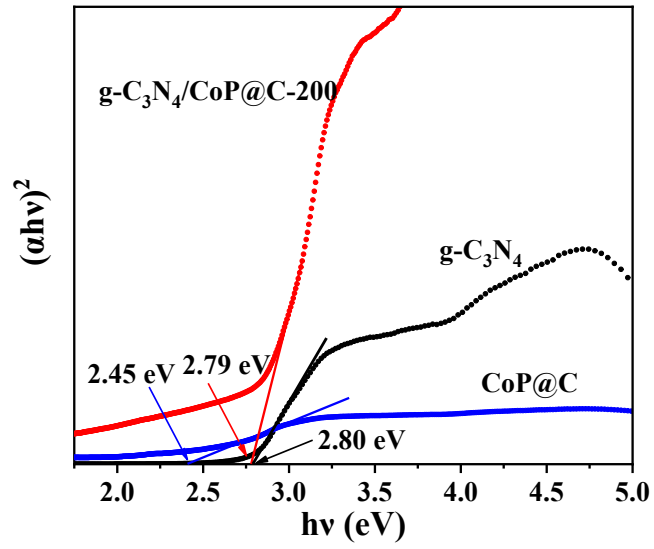

**Figure S3.**  $(\alpha h\nu)^2$  versus  $h\nu$  plot of  $g\text{-C}_3\text{N}_4$ ,  $\text{CoP}@C$  and  $g\text{-C}_3\text{N}_4/\text{CoP}@C\text{-200}$ .

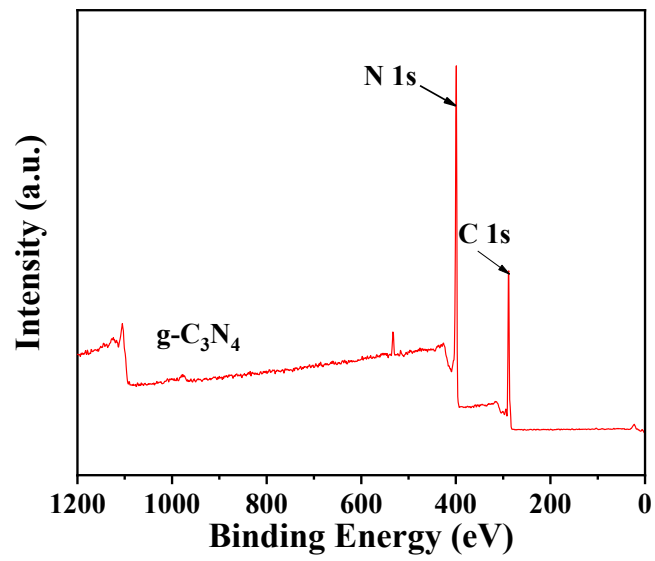

**Figure S4.** XPS survey spectrum of the  $g\text{-C}_3\text{N}_4$ .

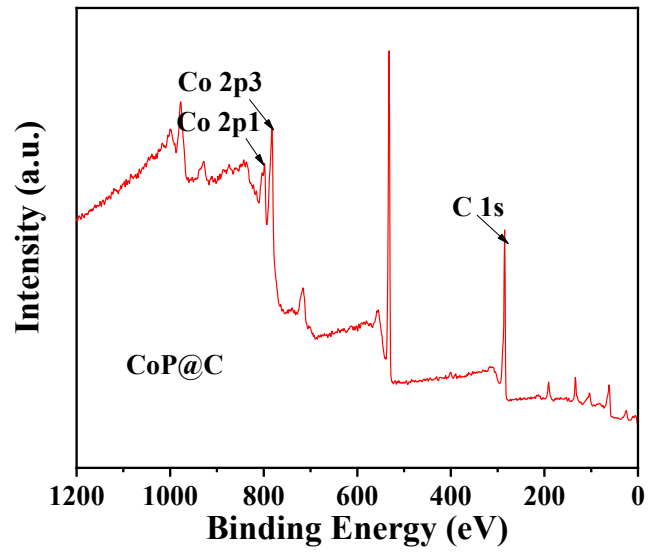

Figure S5. XPS survey spectrum of the CoP@C.

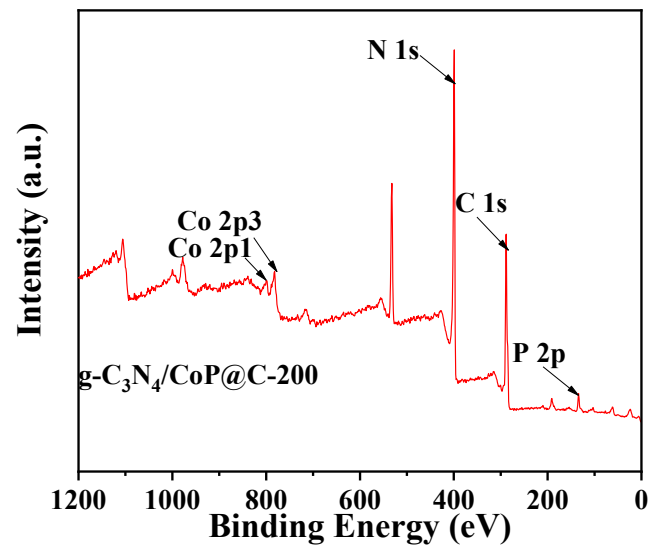

Figure S6. XPS survey spectrum of the g-C<sub>3</sub>N<sub>4</sub>/CoP@C.

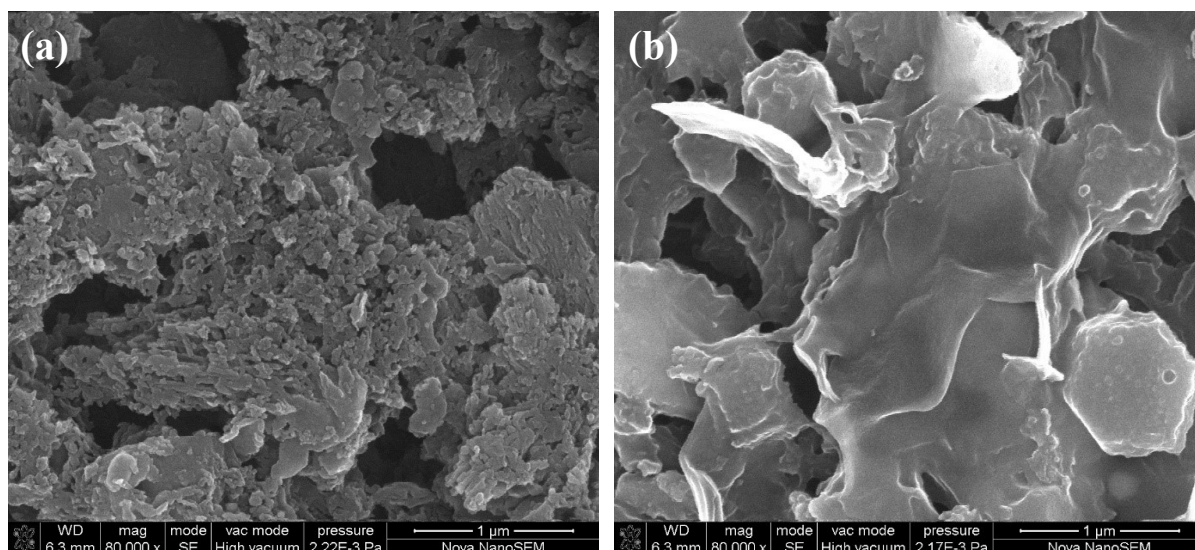

**Figure S7.** SEM of (a) bulk g-C<sub>3</sub>N<sub>4</sub> and g-C<sub>3</sub>N<sub>4</sub> nanosheet.

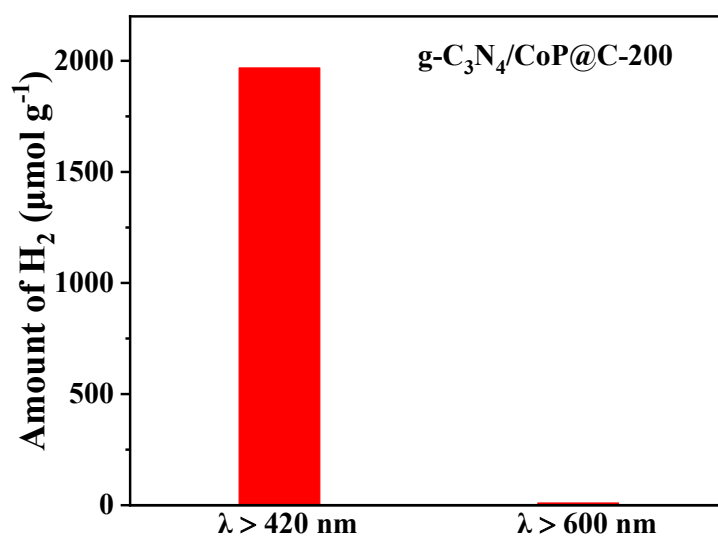

**Figure S8.** H<sub>2</sub> evolution of g-C<sub>3</sub>N<sub>4</sub>/CoP@C-200 under illumination (λ > 420 nm and λ > 600 nm).

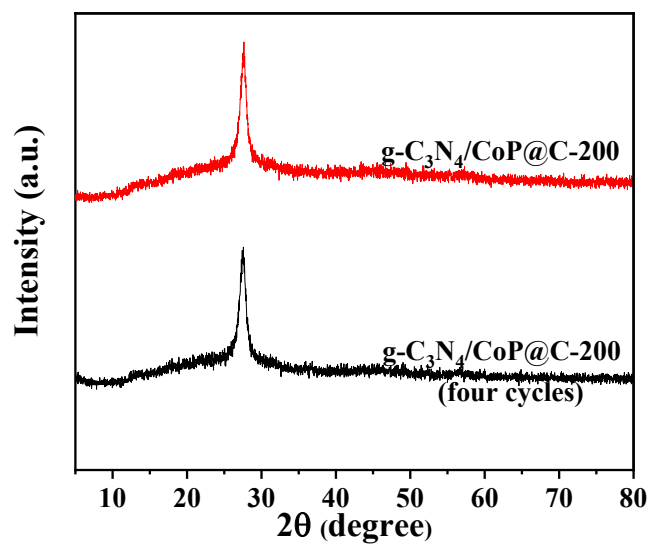

**Figure S9.** XRD patterns of g-C<sub>3</sub>N<sub>4</sub>/CoP@C-200 before and after photocatalysis.

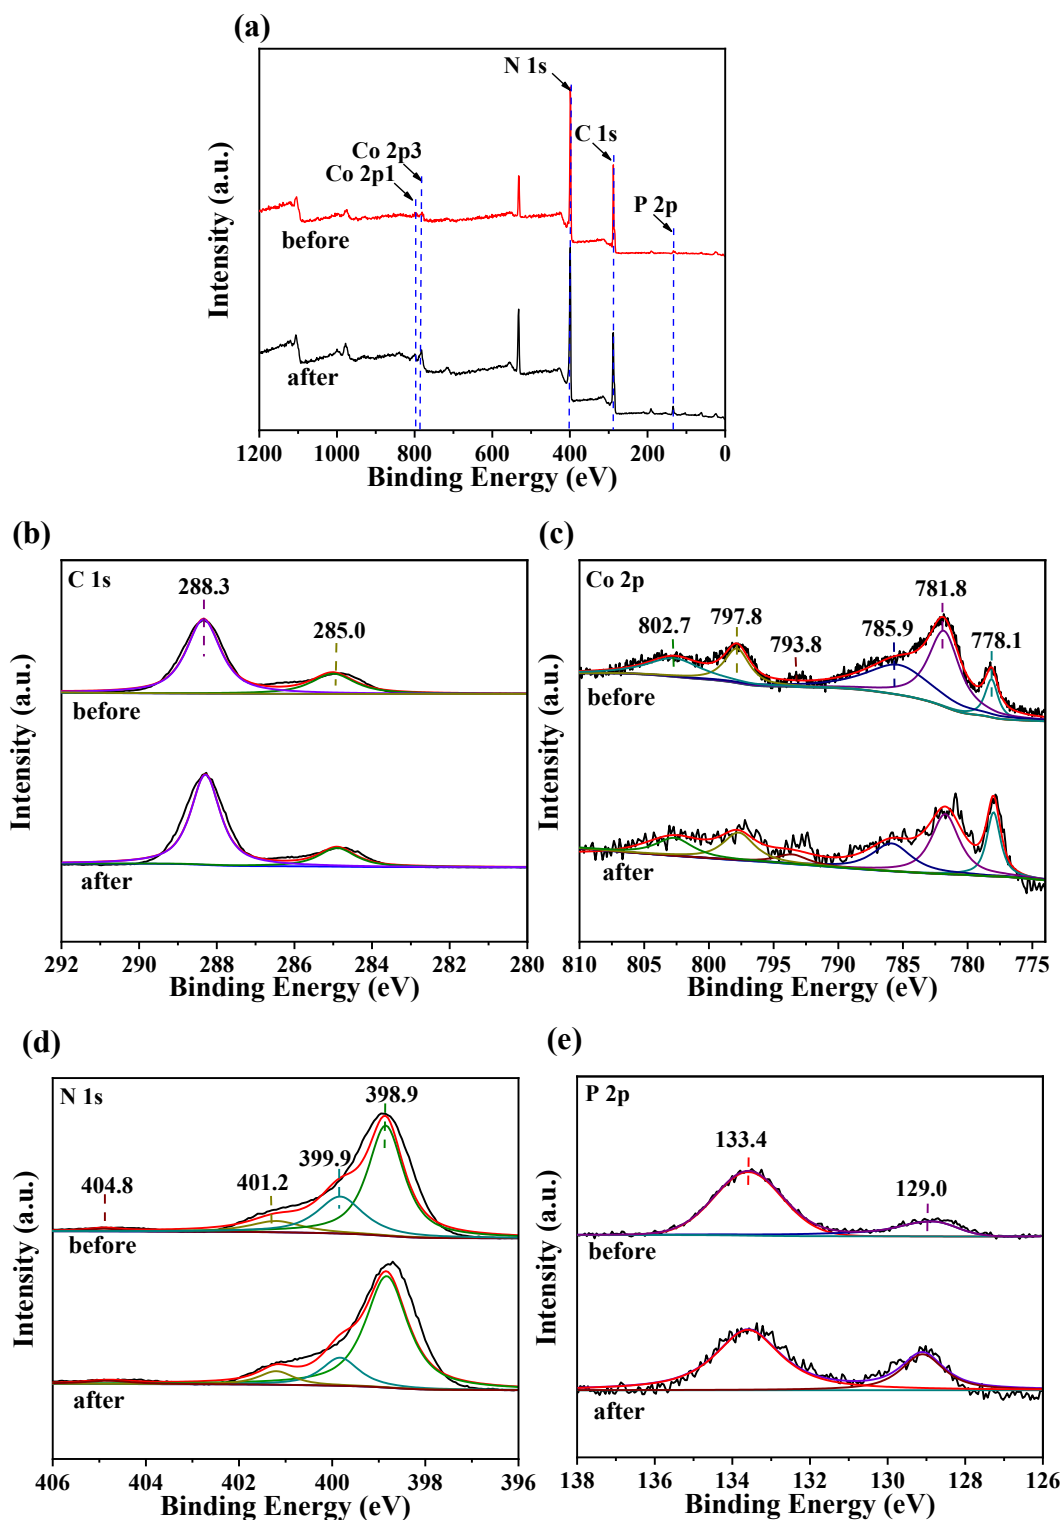

**Figure S10.** XPS spectra of g-C<sub>3</sub>N<sub>4</sub>/CoP@C-200 before and after photocatalysis. The similar peaks can be detected in the C 1s, Co 2p, N1s and P 2p spectra before and after photoreaction.

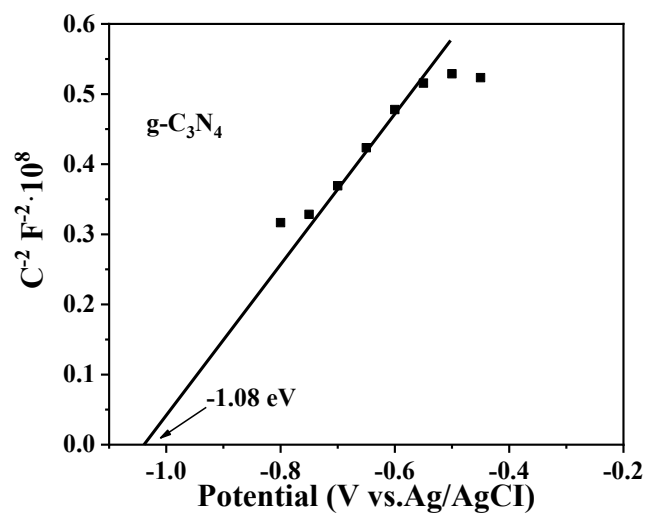

**Figure S11.** Mott-Schottky plots of g-C<sub>3</sub>N<sub>4</sub>.
